# Supplementary material
Source: PubMed Central journal article supplement (PMC2783335)

Supplementary Information for  
**Systematic RNA interference reveals that oncogenic *KRAS*-  
driven cancers require TBK1**

David A. Barbie, Pablo Tamayo, Jesse S. Boehm, So Young Kim, Susan E. Moody, Ian F. Dunn, Anna C. Schinzel, Peter Sandy, Etienne Meylan, Claudia Scholl, Stefan Frohling, Edmond M. Chan, Martin L. Sos, Kathrin Michel, Craig Mermel, Serena J. Silver, Barbara A. Weir, Jan H. Reiling, Qing Sheng, Piyush B. Gupta, Raymond C. Wadlow, Hanh Le, Sebastian Hoersch, Ben S. Wittner, Sridhar Ramaswamy, David M. Livingston, David M. Sabatini, Matthew Meyerson, Roman K. Thomas, Eric S. Lander, Jill P. Mesirov, David E. Root, D. Gary Gilliland, Tyler Jacks, William C. Hahn\*

\*To whom correspondence should be addressed. Email: [william\\_hahn@dfci.harvard.edu](mailto:william_hahn@dfci.harvard.edu)

This file includes:

Figure legends for Supplementary Figures 1 through 11

Supplementary Tables 1 through 5

Supplemental Figures 1 through 11

## Figure Legends

**Supplementary Fig. 1.** Schematic of experimental design. Large scale shRNA screens for proliferation/viability were performed in 19 cell lines using a library of 5002 shRNAs targeting 957 genes enriched in kinases and phosphatases. Cancer cell lines harboring oncogenic *KRAS* alleles were identified and segregated from cell lines with wild type (WT) *KRAS* alleles. Complementary computational approaches were utilized to identify genes whose suppression selectively impaired proliferation/viability in *KRAS* mutant cells. Candidate genes were then retested in a secondary screen in a new panel of cell lines. *KRAS* itself was the top-ranked gene identified by this approach, followed by *TBK1*.

**Supplementary Fig. 2.** *KRAS*-specific shRNAs identified by computational analysis of RNAi screening datasets suppress *KRAS* expression. (a) Immunoblot of *KRAS* in DLD-1 cells expressing *KRAS*-specific shRNAs. The three *KRAS* shRNAs that resulted in selective proliferation/viability impairment in *KRAS* mutant cell lines in the primary screens (denoted by \*) all efficiently suppressed *KRAS* expression. (b) B-score values were averaged for these three *KRAS*-specific shRNAs in each cell line, and compared between *KRAS* wild-type (WT) and *KRAS* mutant cell lines from the primary screens. Dotted line reflects a B-score value of zero. *KRAS* dependence was greater in cell lines carrying *KRAS* mutations than in wild type cells ( $p < 0.01$ , t-test).

**Supplementary Fig. 3.** *KRAS* mutation status and *KRAS* dependence of non-small cell lung cancer (NSCLC) cell lines selected for the secondary screen. (a) *KRAS* codon 12 was sequenced

in all cell lines (3'-5' direction shown), confirming the known *KRAS* mutation status of each line. (b) Viability following suppression of *KRAS* expression with 2 different *KRAS*-specific shRNAs across the 4 cell lines with mutant *KRAS* (left) and 4 WT *KRAS* cell lines (right). Cell viability data was determined using CellTiterGlo and correlated with apoptosis (see Supplementary Fig. 4). The mean and standard error of the mean (SEM) of triplicate samples normalized to the effects of the shGFP control vector are shown.

**Supplementary Fig. 4.** *KRAS* suppression induces apoptosis in cell lines harboring *KRAS* mutations (a) Immunoblot of *KRAS* following *KRAS*-specific shRNA expression across all 8 lung cancer cell lines to confirm target suppression. Lysates were prepared 72 h after expression of the indicated shRNAs. *KRAS* protein was not observed at baseline in NCI-H522 cells. (b) Immunoblot of cleaved PARP in lysates from NCI-H23 cells (mutant *KRAS*) compared with NCI-H1437 cells (wild type *KRAS*) revealed specific induction of PARP cleavage in NCI-H23 cells following *KRAS* suppression. (c) Immunoblot of *KRAS* in NCI-H23 cells expressing additional *KRAS*-specific shRNAs tested in the secondary screen. Lysates were prepared 72 h after expression of the indicated shRNAs.

**Supplementary Fig. 5.** shRNAs in the secondary screen showed selective proliferation/viability impairment in *KRAS* mutant cells. (a) Viability data was normalized using percent of control (POC) and  $\log_{10}$  transformed to center values around zero. As described in the full methods, we independently screened this panel of cell lines with two sets of control shRNAs: 20 control shRNAs targeting exogenous reporter genes included on the screening plate, in addition to a separate larger set of 84 control shRNAs, to provide an additional measure of the background

distribution for this secondary screen. Data was analyzed using the t-test statistic in Comparative Marker Selection to identify shRNAs that selectively impaired proliferation/viability in *KRAS* mutant cell lines relative to wild-type cell lines for both the candidate secondary screen plate and the control shRNA plate that was screened independently. The resulting lists of shRNAs were filtered to identify shRNAs with significant viability impairment in the mutant *KRAS* class, defined as class mean LogPOC < -0.2 (~37% viability impairment). A more negative value on the x-axis indicates more selective effects on proliferation/viability in the mutant *KRAS* class. A significantly greater proportion (y-axis) of shRNAs from the secondary screen plate selectively impaired proliferation/viability in *KRAS* mutant cells compared with the control shRNA plate ( $p=0.0002$ ). We used the t-test statistic threshold that was maximally achieved by the set of control shRNAs (dotted line) as the boundary to identify the top 25 shRNAs *KRAS* synthetic lethal shRNAs that scored on the candidate plate. (b) Supervised analysis identified 6 *KRAS*-specific shRNAs (bold) within the top 25 candidate shRNAs that induced selective proliferation/viability impairment in cells harboring mutant *KRAS*. Two out of 5 *TBK1*-specific shRNAs tested (bold) were also identified within this list. Red represents increased proliferation/viability and blue represents decreased proliferation/viability.

**Supplementary Fig. 6.** *TBK1* suppression induces apoptosis in cells with mutant *KRAS* in a RAF- and AKT-independent manner. (a) DAPI (blue) and TUNEL staining (green) of NCI-H23 (upper panels) and NCI-1437 cells (lower panels) 5 d following *TBK1* suppression. (b) Immunoblot of murine *Tbk1* and cleaved caspase 3 in LKR13 cells 72 h following *Tbk1* suppression. The only *Tbk1*-specific shRNA resulting in effective *Tbk1* suppression (sh*Tbk1*-2222) induced significant cleavage of caspase 3. (c) Confirmation of *CRAF*, *BRAF*, *AKT1*, and *RALB* suppression by specific shRNAs. We note that *RALB* shRNAs were not assayed in the

primary shRNA screens. (d) Immunoblot of phospho-ERK and phospho-AKT following *KRAS* or *TBK1* suppression (effective *TBK1*-specific shRNAs denoted by \*). Suppression of *TBK1* expression in these same lysates is shown in Fig. 2a.

**Supplementary Fig. 7.** NF- $\kappa$ B target gene activation downstream of oncogenic *KRAS*. (a) Shown is the enrichment plot for a RAS oncogenic signature, which was the most significantly correlated gene set with oncogenic *KRAS* expression in AALE cells. Two separate NF- $\kappa$ B gene sets were identified in the top 10 out of 1844 gene sets examined, and a third TNF-related NF- $\kappa$ B signature was identified just below this threshold. Red represents enrichment in AALE-K samples, blue represents enrichment in AALE-V samples, black lines represent individual members of the gene set, and the green plot represents the distribution of enrichment scores. (b) Expression of the IKK $\epsilon$  regulated NF- $\kappa$ B target genes compared with IRF3 target genes in AALE-K and AALE-V cells (duplicate samples). Red represents up-regulation, blue represents down-regulation. Arrows denote genes examined following *TBK1* suppression in (c). (c) Quantitative RT-PCR was used to analyze the expression of genes from the IRF3 and IKK $\epsilon$ -NF- $\kappa$ B subsets in cancer cell lines expressing mutant *KRAS* (NCI-H23) following expression of shRNAs specific for *KRAS*, *TBK1* or GFP. The mean and SD of triplicate experiments normalized to GAPDH as an internal amplification control are shown.

**Supplementary Fig. 8.** Regulation of IKB $\alpha$  family members by *KRAS* and *TBK1*. (a) Fractionation of lysates from AALE-K and AALE-V cells was performed to assess the levels of cytoplasmic IKB $\alpha$  and nuclear IRF3. Densitometry was used to normalize IKB $\alpha$  levels to GAPDH (cytoplasmic marker) and nuclear IRF3 levels to lamin A/C (nuclear marker). (b) IKB $\alpha$

and p105 levels were measured using densitometry of immunoblots shown in Fig. 3e and normalized to actin levels. Values were compared with those found in control AALE-V cells.

**Supplementary Fig. 9.** Inhibition of NF- $\kappa$ B activity selectively impairs viability of isogenic cells expressing oncogenic KRAS. Cell viability measured 6 d after expression of a control vector (pBP) or an I $\kappa$ B $\alpha$ -super-repressor (IKB-SR) in AALE-K or AALE-V cells. Cell viability data represents the mean of triplicate samples normalized to control vector expression. Specific viability impairment was noted following IKB-SR expression in AALE-K cells ( $p \leq 0.008$ , t-test).

**Supplementary Fig. 10.** c-REL inhibition induces apoptosis in KRAS mutant and dependent cells (a) Immunoblot of IRF3 and c-REL in NCI-H23 cells (mutant *KRAS*) following *IRF3* or *c-REL*-specific shRNA expression. Lysates were prepared 72 h after expression of the indicated shRNAs. PARP cleavage correlated with the degree of c-REL suppression (lower panel, right). (b) Nuclear/cytoplasmic fractionation of lysates in cells expressing *TBK1*- or *GFP*-specific shRNAs in NCI-H23 cells. Immunoblotting was performed using antibodies specific for p105, c-REL, and TBK1. (c) Specific co-immunoprecipitation of p105, but not TBK1, with endogenous c-REL in NCI-H23 cells. (d) Expression of anti-apoptotic genes in NCI-H23 cells following expression of shTBK1 or shGFP by qRT-PCR. Mean and SD of triplicate experiments normalized to GAPDH are shown.

**Supplementary Fig. 11.** BCL-XL expression fails to rescue viability following *survivin* suppression in *KRAS* mutant cells. (a) NCI-H23 cells stably expressing a V5-tagged BCL-XL or a control protein (LACZ) were generated, and cell viability was examined 6 d following

expression of *TBK1*-, *survivin*-, or *GFP*-specific shRNAs. The means and SD of triplicate samples, normalized to the effects of the shGFP control vector are shown. (b) Over-expression of V5-tagged BCL-XL and suppression of TBK1 and survivin was confirmed by immunoblotting. Lysates were prepared 72 h after expression of the indicated shRNAs.

**Supplementary Table 1**  
Cell Lines Tested in Primary Screens

| Cell Lines               | Tissue of Origin   | <i>KRAS</i> Status     |
|--------------------------|--------------------|------------------------|
| MDA-MB-231               | Breast             | G13D                   |
| HCT116                   | Colon              | G13D                   |
| DLD1                     | Colon              | G13D                   |
| TOV21G                   | Ovarian            | G12C                   |
| A549                     | Lung               | G12S                   |
| RPMI-8226                | Myeloma            | G12A*                  |
| NOMO-1                   | Leukemia           | G13D                   |
| THP-1                    | Leukemia           | Wild Type              |
| T47D                     | Breast             | Wild Type              |
| MCF7                     | Breast             | Wild Type              |
| MDA-MB-453               | Breast             | Wild Type              |
| U87                      | Glioblastoma       | Wild Type              |
| LN229                    | Glioblastoma       | Wild Type*             |
| OVCAR8                   | Ovarian            | Wild Type <sup>+</sup> |
| PC3                      | Prostate           | Wild Type              |
| LNCaP                    | Prostate           | Wild Type              |
| 786-0                    | Renal              | Wild Type <sup>+</sup> |
| Normal Human Fibroblasts | Skin               | Wild Type              |
| HMEC-TERT                | Mammary Epithelium | Wild Type              |

\*Discordance between *KRAS* mutation status and *KRAS* dependence noted in primary screen

<sup>+</sup>RAS/NF- $\kappa$ B signature positive

**Supplementary Table 2**  
Candidate *KRAS* Synthetic Lethal Genes

| Hairpin-Level Analysis | Hairpin Set (RIGER) Analysis |
|------------------------|------------------------------|
| <i>ADRBK2</i>          | <i>ADRBK2</i>                |
| <i>CDC2L1</i>          | <i>ARHGEF2</i>               |
| <i>CPNE1</i>           | <i>BRCA1</i>                 |
| <i>EPHA6</i>           | <i>CDC2</i>                  |
| <i>FIGN</i>            | <i>CDC2L2</i>                |
| <i>HSPA5</i>           | <i>CDKN2C</i>                |
| <i>INSRR</i>           | <i>CLK3</i>                  |
| <i>KRAS</i>            | <i>CNP</i>                   |
| <i>MAP3K11</i>         | <i>DYRK1B</i>                |
| <i>MAPK9</i>           | <i>EPHA6</i>                 |
| <i>MAPK14</i>          | <i>FIGN</i>                  |
| <i>NME6</i>            | <i>FLT3LG</i>                |
| <i>RAF1</i>            | <i>FN3KRP</i>                |
| <i>STK35</i>           | <i>FXN</i>                   |
| <i>TBK1</i>            | <i>GPSM2</i>                 |
| <i>TSSK2</i>           | <i>HSPA5</i>                 |
| <i>VRK3</i>            | <i>INSRR</i>                 |
|                        | <i>KRAS</i>                  |
|                        | <i>LOC390529</i>             |
|                        | <i>LOC401313</i>             |
|                        | <i>LOC402434</i>             |
|                        | <i>MAP3K8</i>                |
|                        | <i>MAPK14</i>                |
|                        | <i>MAPKAP1</i>               |
|                        | <i>MAPKAPK5</i>              |
|                        | <i>MASK</i>                  |
|                        | <i>NME6</i>                  |
|                        | <i>NR1I2</i>                 |
|                        | <i>NR1I3</i>                 |
|                        | <i>PPARA</i>                 |
|                        | <i>PRKRA</i>                 |
|                        | <i>PSKH2</i>                 |
|                        | <i>PSMD14</i>                |
|                        | <i>PTCH2</i>                 |
|                        | <i>STK35</i>                 |
|                        | <i>TBK1</i>                  |
|                        | <i>TSSK2</i>                 |
|                        | <i>VRK1</i>                  |
|                        | <i>VRK3</i>                  |
|                        | <i>YSK4</i>                  |



**Supplementary Table 3. Top 250 shRNAs identified by feature selection method**

| shRNA                | Gene     | t-test score |
|----------------------|----------|--------------|
| NM_005160.x-630s1c1  | ADRBK2   | -3.91        |
| NM_053006.x-321s1c1  | TSSK2    | -3.56        |
| NM_016440.x-150s1c1  | VRK3     | -3.51        |
| NM_003161.x-1417s1c1 | RPS6KB1  | -3.47        |
| NM_020642.2-413s1c1  | C11orf17 | -3.46        |
| NM_006875.x-551s1c1  | PIM2     | -3.38        |
| NM_005430.2-1060s1c1 | W01      | -3.38        |
| NM_139012.x-503s1c1  | MAPK14   | -3.38        |
| NM_007181.x-790s1c1  | MAP4K1   | -3.37        |
| NM_003992.x-301s1c1  | CLK3     | -3.36        |
| NM_173655.x-424s1c1  | EPHA6    | -3.34        |
| NM_001699.x-2187s1c1 | AXL      | -3.21        |
| NM_014683.x-945s1c1  | ULK2     | -3.20        |
| NM_003682.2-2486s1c1 | MADD     | -3.19        |
| NM_001222.x-1384s1c1 | CAMK2G   | -3.16        |
| NM_080789.1-153s1c1  | ACPT     | -3.14        |
| NM_015247.1-2059s1c1 | CYLD     | -3.10        |
| NM_145162.x-791s1c1  | MAP2K5   | -3.03        |
| NM_003845.x-635s1c1  | DYRK4    | -3.02        |
| NM_173655.x-1500s1c1 | EPHA6    | -2.96        |
| NM_025052.x-665s1c1  | YSK4     | -2.96        |
| NM_021976.3-1463s1c1 | RXRΒ     | -2.93        |
| NM_005805.1-754s1c1  | PSMD14   | -2.93        |
| NM_024960.3-703s1c1  | PANK2    | -2.89        |
| NM_006098.2-388s1c1  | GNB2L1   | -2.88        |
| NM_017771.x-686s1c1  | PXK      | -2.88        |
| NM_052827.1-908s1c1  | CDK2     | -2.87        |
| NM_001799.x-878s1c1  | CDK7     | -2.86        |
| NM_002082.x-788s1c1  | GRK6     | -2.85        |
| NM_139069.x-401s1c1  | MAPK9    | -2.84        |
| NM_006243.2-1800s1c1 | PPP2R5A  | -2.83        |
| NM_006374.3-485s1c1  | STK25    | -2.82        |
| NM_007294.1-356s1c1  | BRCA1    | -2.81        |
| NM_002953.x-957s1c1  | RPS6KA1  | -2.79        |
| NM_022073.x-692s1c1  | EGLN3    | -2.75        |
| NM_014705.2-2965s1c1 | DOCK4    | -2.74        |
| NM_005027.2-1934s1c1 | PIK3R2   | -2.74        |
| NM_016524.x-716s1c1  | SYT17    | -2.73        |
| NM_005198.3-686s1c1  | CHKB     | -2.71        |
| NM_004197.x-1177s1c1 | STK19    | -2.69        |
| NM_005036.x-495s1c1  | PPARA    | -2.68        |
| NM_002908.1-2071s1c1 | REL      | -2.68        |
| NM_016308.1-367s1c1  | CMPK     | -2.63        |
| NM_001459.2-398s1c1  | FLT3LG   | -2.62        |
| NM_022158.2-413s1c1  | FN3K     | -2.62        |
| NM_003384.x-1070s1c1 | VRK1     | -2.61        |

|                      |          |       |
|----------------------|----------|-------|
| NM_016440.x-793s1c1  | VRK3     | -2.61 |
| NM_005734.x-2302s1c1 | HIPK3    | -2.59 |
| NM_003738.2-300s1c1  | PTCH2    | -2.58 |
| NM_003889.2-2805s1c1 | NR1I2    | -2.58 |
| NM_004760.x-439s1c1  | STK17A   | -2.55 |
| NM_018086.x-1172s1c1 | FIGN     | -2.52 |
| NM_007014.x-173s1c1  | WWP2     | -2.52 |
| NM_033360.2-509s1c1  | KRAS     | -2.51 |
| NM_000141.x-3402s1c1 | FGFR2    | -2.50 |
| NM_005347.x-1593s1c1 | HSPA5    | -2.48 |
| NM_001787.1-2043s1c1 | CDC2L1   | -2.47 |
| NM_002752.x-160s1c1  | MAPK9    | -2.46 |
| NM_014215.x-2201s1c1 | INSRR    | -2.45 |
| NM_004333.2-1106s1c1 | BRAF     | -2.45 |
| NM_003952.x-1618s1c1 | RPS6KB2  | -2.44 |
| NM_005104.2-2059s1c1 | BRD2     | -2.43 |
| NM_080836.x-814s1c1  | STK35    | -2.42 |
| NM_002513.2-841s1c1  | NME3     | -2.42 |
| NM_053006.x-268s1c1  | TSSK2    | -2.40 |
| NM_080836.x-790s1c1  | STK35    | -2.38 |
| NM_014586.x-1347s1c1 | HUNK     | -2.38 |
| NM_005793.x-212s1c1  | NME6     | -2.37 |
| NM_005713.1-1059s1c1 | COL4A3BP | -2.37 |
| NM_033126.x-241s1c1  | PSKH2    | -2.35 |
| NM_004635.3-550s1c1  | MAPKAPK3 | -2.35 |
| NM_139021.x-284s1c1  | MAPK15   | -2.35 |
| XM_066534.2-369s1c1  | DGKK     | -2.35 |
| NM_054113.2-315s1c1  | CIB3     | -2.34 |
| NM_004723.x-2698s1c1 | ARHGEF2  | -2.34 |
| NM_003647.1-1829s1c1 | DGKE     | -2.34 |
| NM_006888.2-461s1c1  | CALM1    | -2.34 |
| NM_152230.2-1075s1c1 | IPMK     | -2.34 |
| NM_024779.3-298s1c1  | PIP5K2C  | -2.33 |
| NM_145203.2-1021s1c1 | CSNK1A1L | -2.32 |
| NM_001433.x-3319s1c1 | ERN1     | -2.31 |
| NM_005160.x-1226s1c1 | ADRBK2   | -2.31 |
| NM_000222.x-173s1c1  | KIT      | -2.31 |
| NM_013254.x-1536s1c1 | TBK1     | -2.30 |
| NM_001315.x-1118s1c1 | MAPK14   | -2.28 |
| NM_001123.x-991s1c1  | ADK      | -2.28 |
| NM_015375.1-2638s1c1 | RIPK5    | -2.28 |
| NM_004327.x-3023s1c1 | BCR      | -2.27 |
| NM_024960.3-391s1c1  | PANK2    | -2.27 |
| NM_003236.1-61s1c1   | TGFA     | -2.27 |
| NM_013296.3-2024s1c1 | GPSM2    | -2.26 |
| NM_031464.2-1783s1c1 | RPS6KL1  | -2.26 |
| NM_005356.x-1281s1c1 | LCK      | -2.25 |
| NM_002945.2-122s1c1  | RPA1     | -2.25 |
| NM_005456.x-1442s1c1 | MAPK8IP1 | -2.25 |

|                      |         |       |
|----------------------|---------|-------|
| NM_003390.x-3616s1c1 | WEE1    | -2.24 |
| NM_004131.3-585s1c1  | GZMB    | -2.24 |
| NM_001786.x-820s1c1  | CDC2    | -2.24 |
| NM_001259.x-515s1c1  | CDK6    | -2.23 |
| NM_006282.x-287s1c1  | STK4    | -2.23 |
| NM_003494.x-684s1c1  | DYSF    | -2.23 |
| NM_005983.2-1374s1c1 | SKP2    | -2.22 |
| NM_001744.x-354s1c1  | CAMK4   | -2.22 |
| NM_005546.x-430s1c1  | ITK     | -2.22 |
| NM_024876.2-530s1c1  | ADCK4   | -2.22 |
| NM_018086.x-855s1c1  | FIGN    | -2.21 |
| NM_033360.2-407s1c1  | KRAS    | -2.21 |
| NM_006374.3-1004s1c1 | STK25   | -2.19 |
| NM_198452.1-352s1c1  | PNCK    | -2.19 |
| NM_014840.x-1935s1c1 | NUAK1   | -2.18 |
| NM_002880.x-1764s1c1 | RAF1    | -2.18 |
| NM_003640.2-4162s1c1 | IKBKAP  | -2.18 |
| NM_003390.x-1966s1c1 | WEE1    | -2.18 |
| NM_005255.x-1870s1c1 | GAK     | -2.18 |
| NM_007174.1-5709s1c1 | CIT     | -2.17 |
| NM_004714.x-778s1c1  | DYRK1B  | -2.17 |
| NM_001363.2-760s1c1  | DKC1    | -2.17 |
| NM_024117.x-1308s1c1 | MAPKAP1 | -2.14 |
| NM_002576.x-1184s1c1 | PAK1    | -2.14 |
| NM_006238.x-1314s1c1 | PPARD   | -2.14 |
| NM_003253.1-3630s1c1 | TIAM1   | -2.14 |
| NM_014381.1-2936s1c1 | MLH3    | -2.13 |
| NM_000251.1-441s1c1  | MSH2    | -2.11 |
| NM_005541.2-2387s1c1 | INPP5D  | -2.11 |
| NM_004714.x-1353s1c1 | DYRK1B  | -2.11 |
| NM_006256.1-3041s1c1 | PKN2    | -2.10 |
| NM_017572.2-565s1c1  | MKNK2   | -2.10 |
| NM_001346.x-1954s1c1 | DGKG    | -2.09 |
| NM_033123.x-1864s1c1 | PLCZ1   | -2.08 |
| NM_153809.1-1464s1c1 | TAF1L   | -2.08 |
| NM_033133.x-1010s1c1 | CNP     | -2.07 |
| NM_000144.3-796s1c1  | FXN     | -2.06 |
| NM_000368.2-3671s1c1 | TSC1    | -2.05 |
| NM_001203.x-742s1c1  | BMPR1B  | -2.04 |
| NM_002529.x-214s1c1  | ORK1    | -2.04 |
| NM_001982.1-2653s1c1 | ERBB3   | -2.04 |
| NM_021133.x-1216s1c1 | RNASEL  | -2.04 |
| NM_032037.1-692s1c1  | TSSK6   | -2.04 |
| NM_020366.x-3819s1c1 | RPGRIP1 | -2.03 |
| NM_006098.2-297s1c1  | GNB2L1  | -2.02 |
| NM_005204.x-870s1c1  | MAP3K8  | -2.02 |
| NM_001203.x-1519s1c1 | BMPR1B  | -2.02 |
| NM_004517.x-700s1c1  | ILK     | -2.02 |
| NM_003936.3-1091s1c1 | CDK5R2  | -2.01 |

|                        |           |       |
|------------------------|-----------|-------|
| NM_004444.x-459s1c1    | EPHB4     | -2.01 |
| NM_021158.3-604s1c1    | TRIB3     | -2.01 |
| NM_199345.1-721s1c1    | LOC375133 | -2.00 |
| NM_001625.2-764s1c1    | AK2       | -2.00 |
| NM_002759.x-904s1c1    | EIF2AK2   | -2.00 |
| NM_005793.x-109s1c1    | NME6      | -1.99 |
| NM_000551.2-625s1c1    | VHL       | -1.99 |
| NM_024800.x-1146s1c1   | NEK11     | -1.99 |
| XM_371835.1-4974s1c1   | IBTK      | -1.98 |
| NM_005233.3-4735s1c1   | EPHA3     | -1.98 |
| NM_001743.3-468s1c1    | CALM2     | -1.98 |
| NM_005122.2-1028s1c1   | NR1I3     | -1.97 |
| NM_004087.1-832s1c1    | DLG1      | -1.96 |
| NM_015148.2-905s1c1    | PASK      | -1.96 |
| NM_019841.x-2249s1c1   | TRPV5     | -1.96 |
| NM_005307.x-753s1c1    | GRK4      | -1.96 |
| NM_025144.2-1319s1c1   | ALPK1     | -1.96 |
| NM_001626.x-656s1c1    | AKT2      | -1.95 |
| NM_003215.x-1286s1c1   | TEC       | -1.94 |
| NM_000061.x-1266s1c1   | BTK       | -1.94 |
| NM_000298.3-1633s1c1   | PKLR      | -1.94 |
| NM_024594.2-377s1c1    | PANK3     | -1.93 |
| NM_001982.1-1638s1c1   | ERBB3     | -1.93 |
| NM_000875.2-1400s1c1   | IGF1R     | -1.93 |
| NM_002880.x-321s1c1    | RAF1      | -1.92 |
| NM_014216.3-754s1c1    | ITPK1     | -1.92 |
| NM_001274.2-1030s1c1   | CHEK1     | -1.92 |
| NM_022740.x-1389s1c1   | HIPK2     | -1.91 |
| NM_003668.x-855s1c1    | MAPKAPK5  | -1.91 |
| NM_001001329.1-408s1c1 | PRKCSH    | -1.91 |
| NM_152928.1-1652s1c1   | CPNE1     | -1.90 |
| NM_031914.x-151s1c1    | SYT16     | -1.89 |
| NM_018127.4-1863s1c1   | ELAC2     | -1.89 |
| NM_003718.x-3040s1c1   | CDC2L5    | -1.89 |
| NM_004360.2-2057s1c1   | CDH1      | -1.89 |
| NM_002929.x-372s1c1    | GRK1      | -1.89 |
| NM_025259.3-2524s1c1   | MSH5      | -1.88 |
| NM_006293.x-743s1c1    | TYRO3     | -1.88 |
| NM_001262.2-1464s1c1   | CDKN2C    | -1.88 |
| NM_005465.x-1757s1c1   | AKT3      | -1.87 |
| NM_001211.x-1560s1c1   | BUB1B     | -1.86 |
| NM_003180.x-1844s1c1   | SYT5      | -1.86 |
| NM_006712.3-978s1c1    | FASTK     | -1.85 |
| NM_014365.x-638s1c1    | HSPB8     | -1.85 |
| NM_013330.x-591s1c1    | NME7      | -1.85 |
| NM_002419.2-3071s1c1   | MAP3K11   | -1.85 |
| NM_003503.x-1638s1c1   | CDC7      | -1.84 |
| NM_000297.2-2005s1c1   | PKD2      | -1.84 |
| NM_002736.1-612s1c1    | PRKAR2B   | -1.84 |

|                      |         |       |
|----------------------|---------|-------|
| NM_001894.x-462s1c1  | CSNK1E  | -1.84 |
| NM_013355.x-1240s1c1 | PKN3    | -1.83 |
| NM_017771.x-1038s1c1 | PXK     | -1.83 |
| NM_005751.3-2615s1c1 | AKAP9   | -1.83 |
| NM_005347.x-1285s1c1 | HSPA5   | -1.83 |
| NM_001259.x-468s1c1  | CDK6    | -1.83 |
| NM_014326.x-1735s1c1 | DAPK2   | -1.83 |
| NM_005235.1-1189s1c1 | ERBB4   | -1.82 |
| NM_004573.x-2070s1c1 | PLCB2   | -1.82 |
| NM_001616.x-568s1c1  | ACVR2A  | -1.82 |
| NM_022128.x-932s1c1  | RBKS    | -1.82 |
| NM_152928.1-1275s1c1 | CPNE1   | -1.81 |
| NM_002752.x-401s1c1  | MAPK9   | -1.81 |
| NM_001744.x-501s1c1  | CAMK4   | -1.81 |
| NM_005923.x-1110s1c1 | MAP3K5  | -1.81 |
| NM_016231.x-1320s1c1 | NLK     | -1.80 |
| NM_198291.1-648s1c1  | SRC     | -1.80 |
| NM_001221.x-1475s1c1 | CAMK2D  | -1.80 |
| NM_017572.2-1172s1c1 | MKNK2   | -1.80 |
| NM_020629.x-432s1c1  | RET     | -1.79 |
| NM_079421.2-376s1c1  | CDKN2D  | -1.79 |
| NM_007064.x-3696s1c1 | KALRN   | -1.79 |
| NM_152696.3-796s1c1  | HIPK1   | -1.79 |
| NM_014215.x-1595s1c1 | INSRR   | -1.78 |
| NM_001220.x-1340s1c1 | CAMK2B  | -1.78 |
| NM_005232.2-2341s1c1 | EPHA1   | -1.78 |
| NM_002447.x-4136s1c1 | MST1R   | -1.78 |
| NM_005030.3-513s1c1  | PLK1    | -1.78 |
| NM_001787.1-2259s1c1 | CDC2L1  | -1.77 |
| NM_001184.2-8099s1c1 | ATR     | -1.77 |
| NM_000534.x-276s1c1  | PMS1    | -1.77 |
| NM_006258.x-3498s1c1 | PRKG1   | -1.77 |
| NM_004336.x-2317s1c1 | BUB1    | -1.77 |
| XM_031706.8-2907s1c1 | MAPKBP1 | -1.76 |
| NM_013233.x-737s1c1  | STK39   | -1.75 |
| NM_001345.4-592s1c1  | DGKA    | -1.75 |
| NM_013254.x-1212s1c1 | TBK1    | -1.75 |
| NM_032409.1-1036s1c1 | PINK1   | -1.75 |
| NM_001274.x-1317s1c1 | CHEK1   | -1.75 |
| NM_001204.x-1962s1c1 | BMPR2   | -1.75 |
| NM_001260.x-335s1c1  | CDK8    | -1.74 |
| NM_003010.2-3471s1c1 | MAP2K4  | -1.74 |
| NM_002419.2-1501s1c1 | MAP3K11 | -1.74 |
| NM_017593.x-539s1c1  | BMP2K   | -1.74 |
| NM_003160.x-1228s1c1 | AURKC   | -1.74 |
| NM_018216.1-897s1c1  | PANK4   | -1.74 |
| NM_002591.2-836s1c1  | PCK1    | -1.73 |
| NM_000076.1-1399s1c1 | CDKN1C  | -1.73 |
| NM_005028.3-533s1c1  | PIP5K2A | -1.72 |

|                      |          |       |
|----------------------|----------|-------|
| NM_003656.x-871s1c1  | CAMK1    | -1.72 |
| NM_004690.x-738s1c1  | LATS1    | -1.72 |
| NM_144610.x-316s1c1  | FLJ25006 | -1.72 |
| NM_003690.3-802s1c1  | PRKRA    | -1.72 |
| NM_006238.x-1932s1c1 | PPARD    | -1.71 |
| NM_030952.x-454s1c1  | NUAK2    | -1.71 |
| NM_017726.x-385s1c1  | PPP1R14D | -1.71 |

**Supplementary Table 4. Genes identified by RIGER with NES < -1**

| Gene      | NES   |
|-----------|-------|
| EPHA6     | -11.1 |
| TBK1      | -10.6 |
| TSSK2     | -9.97 |
| YSK4      | -9.72 |
| FN3KRP    | -7.69 |
| ARHGEF2   | -7.18 |
| KRAS      | -7.07 |
| FIGN      | -6.46 |
| NR1I2     | -6.23 |
| CDKN2C    | -5.9  |
| CDC2      | -5.86 |
| FXN       | -5.81 |
| GPSM2     | -5.76 |
| CLK3      | -5.75 |
| HSPA5     | -5.4  |
| STK35     | -5.15 |
| MAPK14    | -4.89 |
| PSMD14    | -4.85 |
| LOC401313 | -4.59 |
| LOC402434 | -4.46 |
| MAPKAP1   | -4.43 |
| MST4      | -4.06 |
| INSRR     | -4.05 |
| PRKRA     | -4.02 |
| VRK3      | -4.02 |
| CDC2L2    | -4.01 |
| NR1I3     | -3.95 |
| PTCH2     | -3.91 |
| VRK1      | -3.82 |
| CNP       | -3.67 |
| MAP3K8    | -3.64 |
| PSKH2     | -3.58 |
| DYRK1B    | -3.58 |
| FLT3LG    | -3.52 |
| NME6      | -3.32 |
| MAPKAPK5  | -3.3  |
| ADRBK2    | -3.18 |
| BRCA1     | -3.17 |
| GRK6      | -3.15 |
| PPARA     | -3.14 |
| LOC390529 | -3.13 |
| PANK2     | -3.07 |
| UMP-CMPK  | -3.03 |
| RAF1      | -3.02 |
| CDH1      | -2.99 |
| PXK       | -2.83 |

|              |       |
|--------------|-------|
| IGF1R        | -2.83 |
| CDK7         | -2.69 |
| RPS6KB1      | -2.67 |
| ACVR1B       | -2.62 |
| ASK          | -2.58 |
| AURKB        | -2.54 |
| PNCK         | -2.49 |
| CSNK1E       | -2.48 |
| GK2          | -2.46 |
| MAP3K12      | -2.44 |
| LOC51760     | -2.43 |
| Pparg        | -2.34 |
| BMPR1A       | -2.32 |
| MAP3K11      | -2.3  |
| FGFR2        | -2.28 |
| CDKL3        | -2.15 |
| PLCB2        | -2.12 |
| MPP1         | -2.09 |
| SYT14L       | -2.08 |
| MUSK         | -2.08 |
| FN3K         | -2.05 |
| WEE1         | -2.05 |
| PKN3         | -2.05 |
| CALM2        | -1.99 |
| CDC2L1       | -1.96 |
| PCTK1        | -1.96 |
| MAPK9        | -1.94 |
| Gabra2       | -1.87 |
| STK4         | -1.84 |
| FLJ25006     | -1.84 |
| PIK3C2G      | -1.83 |
| REL          | -1.83 |
| DKFZP434C131 | -1.8  |
| SF1          | -1.78 |
| CDKN1C       | -1.73 |
| MAP2K5       | -1.73 |
| MAP4K5       | -1.69 |
| LOC441689    | -1.68 |
| CDC7         | -1.66 |
| PIK3AP1      | -1.66 |
| FLJ34389     | -1.64 |
| E2F1         | -1.61 |
| PIP5K2A      | -1.6  |
| ILKAP        | -1.6  |
| NTRK2        | -1.6  |
| PSKH1        | -1.59 |
| LOC139189    | -1.59 |
| C17orf31     | -1.58 |
| DLG2         | -1.57 |



|           |       |
|-----------|-------|
| CAMK2G    | -1.55 |
| FLJ21438  | -1.53 |
| IBTK      | -1.49 |
| DCC       | -1.48 |
| LOC253289 | -1.43 |
| RPS6KL1   | -1.42 |
| DGKG      | -1.41 |
| AATK      | -1.39 |
| DAPK1     | -1.38 |
| Gabra3    | -1.38 |
| MAK       | -1.37 |
| GAK       | -1.37 |
| DCAMKL1   | -1.37 |
| CDKN2D    | -1.33 |
| BMPR1B    | -1.31 |
| PKN1      | -1.31 |
| CYLD      | -1.27 |
| EXO1      | -1.25 |
| PRKDC     | -1.25 |
| IRAK2     | -1.23 |
| DDR1      | -1.23 |
| STK11IP   | -1.23 |
| POT1      | -1.21 |
| CSNK2B    | -1.2  |
| RPS6KA6   | -1.2  |
| DLG4      | -1.19 |
| PFKFB3    | -1.18 |
| STK33     | -1.18 |
| CPNE1     | -1.17 |
| SSTK      | -1.17 |
| PRKCB1    | -1.17 |
| MGC4238   | -1.15 |
| PI4K2B    | -1.15 |
| BCR       | -1.14 |
| XRCC5     | -1.14 |
| CDK9      | -1.14 |
| ACVR1     | -1.14 |
| ARK5      | -1.14 |
| ERBB3     | -1.14 |
| NEK8      | -1.11 |
| TGFBR1    | -1.1  |
| TRPV6     | -1.09 |
| NJMU-R1   | -1.08 |
| FLJ40852  | -1.08 |
| MKNK2     | -1.08 |
| DYRK4     | -1.08 |
| LOC392347 | -1.07 |
| NME3      | -1.02 |
| TTK       | -1.01 |

**Supplementary Table 5. Identities of validated shRNAs used in this study**

| shRNA             | TRC Identifier | NM number            | Sequence (5'-3')      |
|-------------------|----------------|----------------------|-----------------------|
| <i>shKRAS-2</i>   | TRCN0000033263 | NM_033360.2-269slcl  | GACGAATATGATCCAACAATA |
| <i>shKRAS-3</i>   | TRCN0000033262 | NM_033360.2-509slcl  | CCTATGGTCCTAGTAGGAAAT |
| <i>shKRAS-5</i>   | TRCN0000033260 | NM_033360.2-407slcl  | GAGGGCTTTCTTTGTGTATTT |
| <i>shKRAS-6</i>   | TRCN0000040151 | NM_004985.3-297slcl  | CTACAGGAAGCAAGTAGTAA  |
| <i>shKRAS-7</i>   | TRCN0000040152 | NM_004985.3-492slcl  | AGGACTCTGAAGATGTACCTA |
| <i>shKRAS-8</i>   | TRCN0000040150 | NM_004985.3-570slcl  | CTCAGGACTTAGCAAGAAGTT |
| <i>shKRAS-9</i>   | TRCN0000040149 | NM_004985.3-641slcl  | GATGCCTTCTATACATTAGTT |
| <i>shKRAS-10</i>  | TRCN0000010369 | NM_004985.x-1160slcl | CAGTTGAGACCTTCTAATTGG |
| <i>shKRAS-11</i>  | TRCN0000040148 | NM_004985.3-3896slcl | CCTCGTTTCTACACAGAGAAA |
| <i>shTBK1-1</i>   | TRCN0000003182 | NM_013254.x-1773slcl | GCAGAACGTAGATTAGCTTAT |
| <i>shTBK1-4</i>   | TRCN0000003185 | NM_013254.x-1536slcl | GCGGCAGAGTTAGGTGAAATT |
| <i>shCRAF-1</i>   | TRCN0000001066 | NM_002880.x-1236slcl | CGGAGATGTTGCAGTAAAGAT |
| <i>shCRAF-2</i>   | TRCN0000001068 | NM_002880.x-1529slcl | GAGACATGAAATCCAACAATA |
| <i>shCRAF-3</i>   | TRCN0000001065 | NM_002880.x-1764slcl | GCTTCCTTATTCTCACATCAA |
| <i>shBRAF-1</i>   | TRCN0000006289 | NM_004333.2-1106slcl | GCAGATGAAGATCATCGAAAT |
| <i>shBRAF-2</i>   | TRCN0000006290 | NM_004333.2-838slcl  | CCGCTGTCAAACATGTGGTTA |
| <i>shBRAF-3</i>   | TRCN0000006292 | NM_004333.2-1538slcl | CAGCAGTTACAAGCCTTCAAA |
| <i>shAKT1-1</i>   | TRCN0000010163 | NM_005163.x-642slcl  | CGAGTTTGAGTACCTGAAGCT |
| <i>shAKT1-2</i>   | TRCN0000010174 | NM_005163.x-981slcl  | GGACTACCTGCACTCGGAGAA |
| <i>shAKT1-3</i>   | TRCN0000010162 | NM_005163.x-1044slcl | GGACAAGGACGGGCACATTAA |
| <i>shRALB-1</i>   | TRCN0000072957 | NM_002881.2-302slcl  | GAGTTTGTAGAAGACTATGAA |
| <i>shRALB-2</i>   | TRCN0000072954 | NM_002881.2-419slcl  | GCCATTCGAGATAACTACTTT |
| <i>shRALB-3</i>   | TRCN0000072956 | NM_002881.2-688slcl  | CAAGGTGTTCTTTGACCTAAT |
| <i>shIRF3-1</i>   | TRCN0000005919 | NM_001571.1-1016slcl | CCCTTCATTGTAGATCTGATT |
| <i>shIRF3-2</i>   | TRCN0000005921 | NM_001571.1-265slcl  | GCCAACCTGGAAGAGGAATTT |
| <i>shcREL-1</i>   | TRCN0000039983 | NM_002908.1-2071slcl | CCACCTATATAGATGCAGCAT |
| <i>shcREL-2</i>   | TRCN0000039986 | NM_002908.1-981slcl  | CCAGGAAGTTAGTGAATCTAT |
| <i>shcREL-3</i>   | TRCN0000010421 | NM_002908.x-1875slcl | CTTCAGTTGTGCAGATAACAG |
| <i>shSurvivin</i> | TRCT0000023441 | NM_001168.1-214slcl  | CCAGTGTCTTCTGCTTCAA   |
| <i>shGFP</i>      | TRCN0000072181 | clonetechGfp_437slcl | ACAACAGCCACAACGTCTATA |

Figure S1

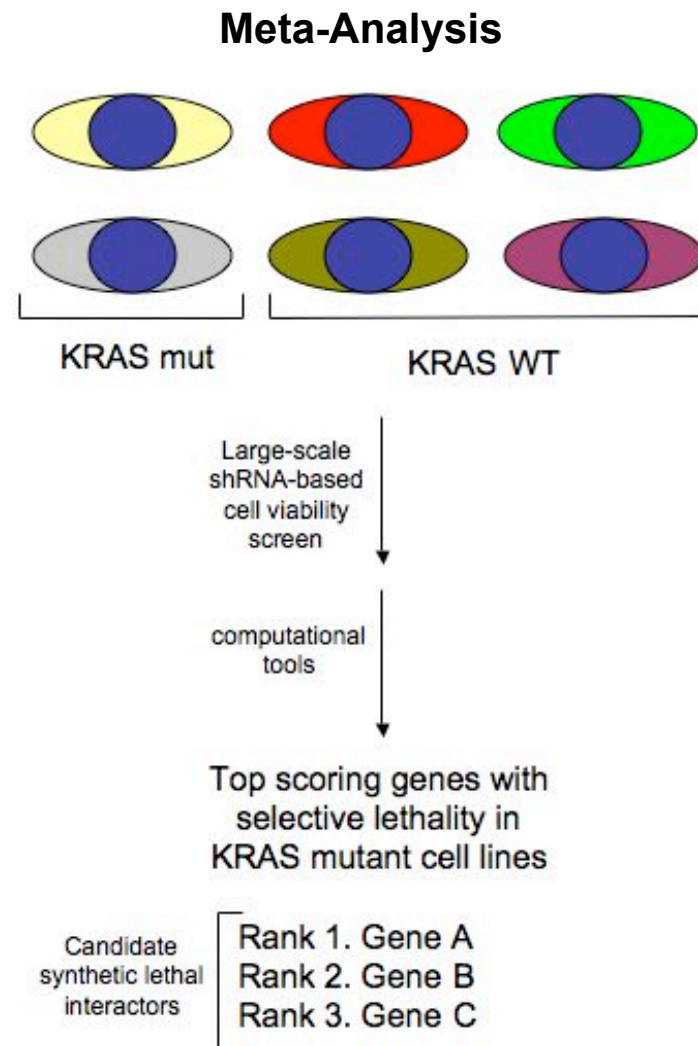

Figure S2

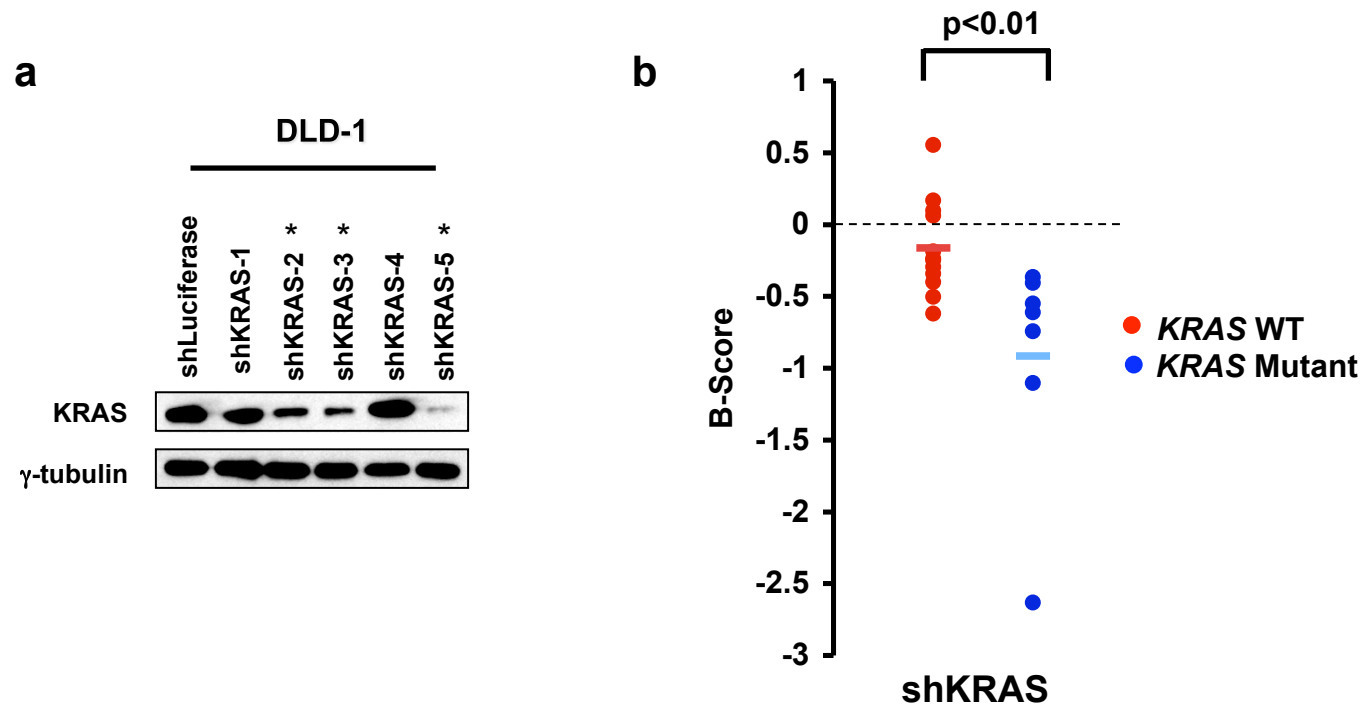

Figure S3

**a**

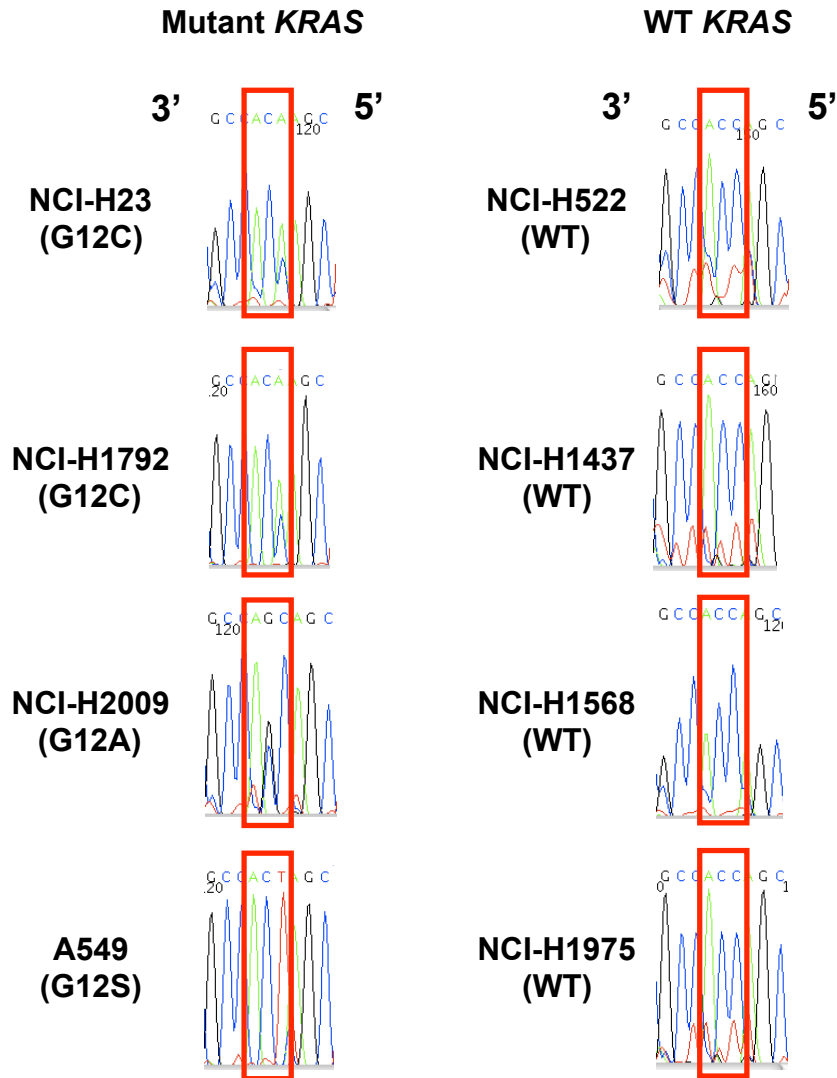

**b**

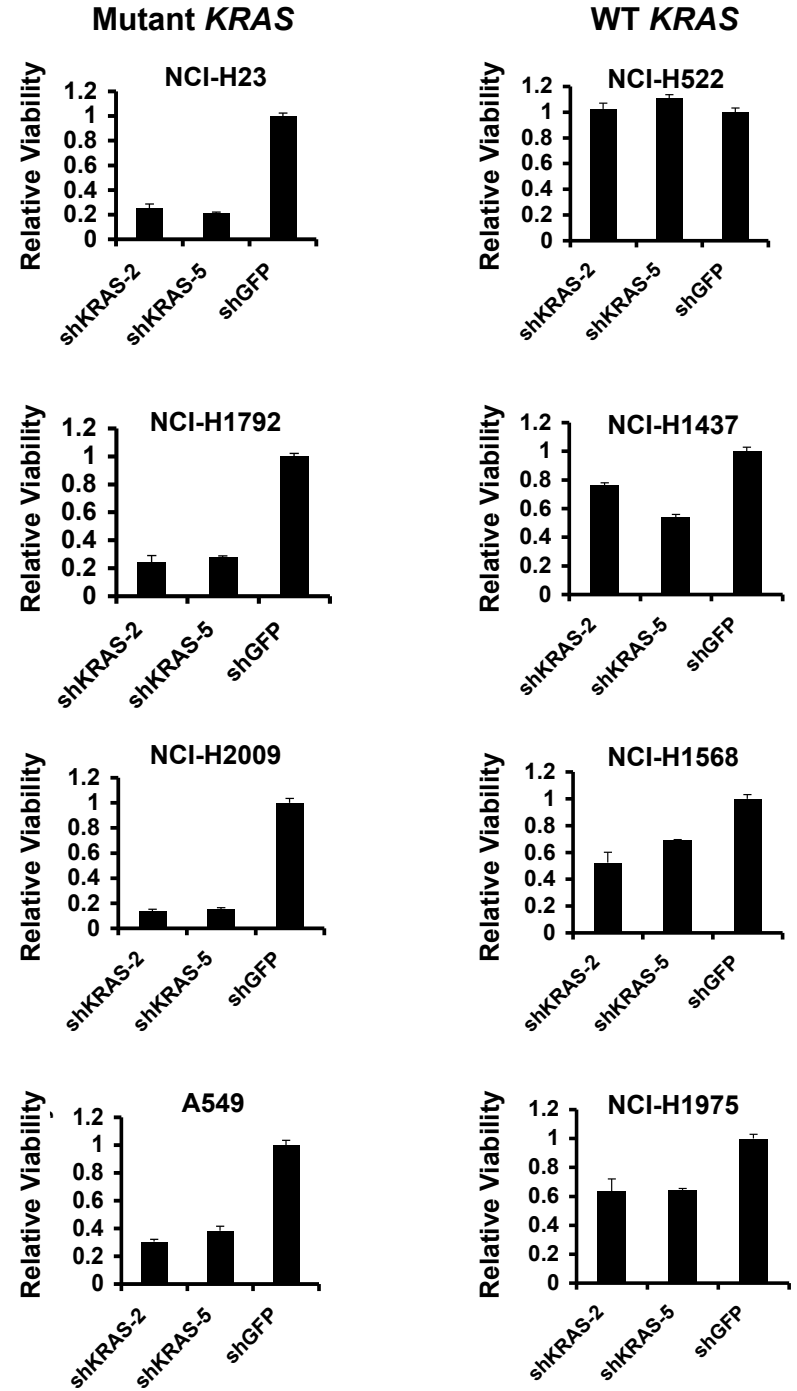

Figure S4

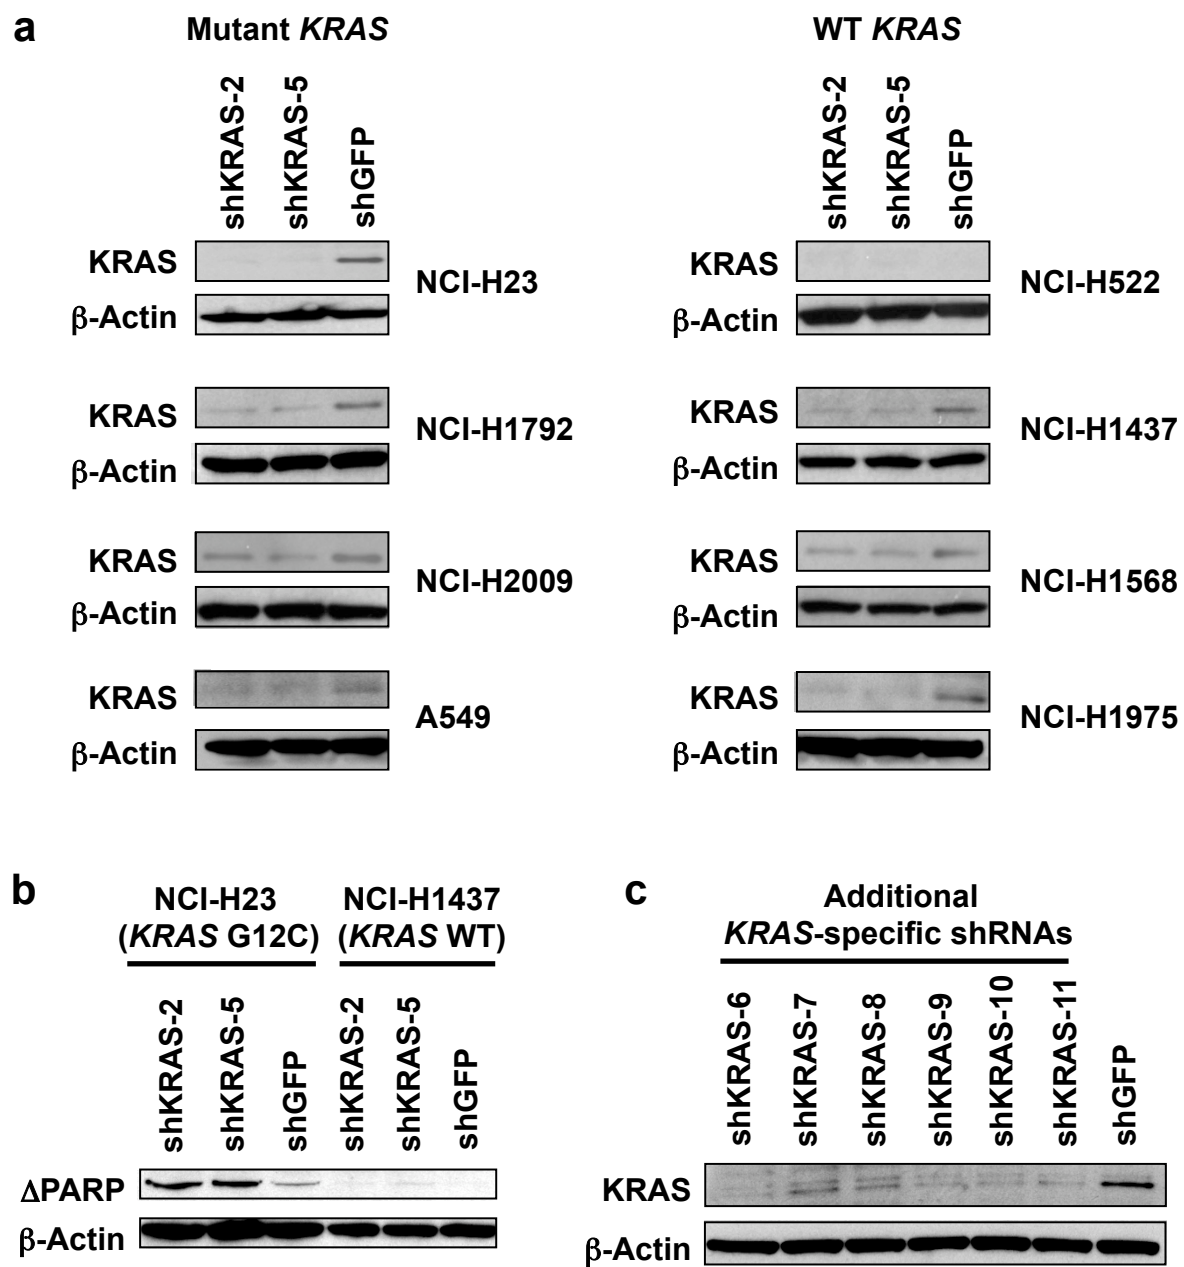



Figure S6

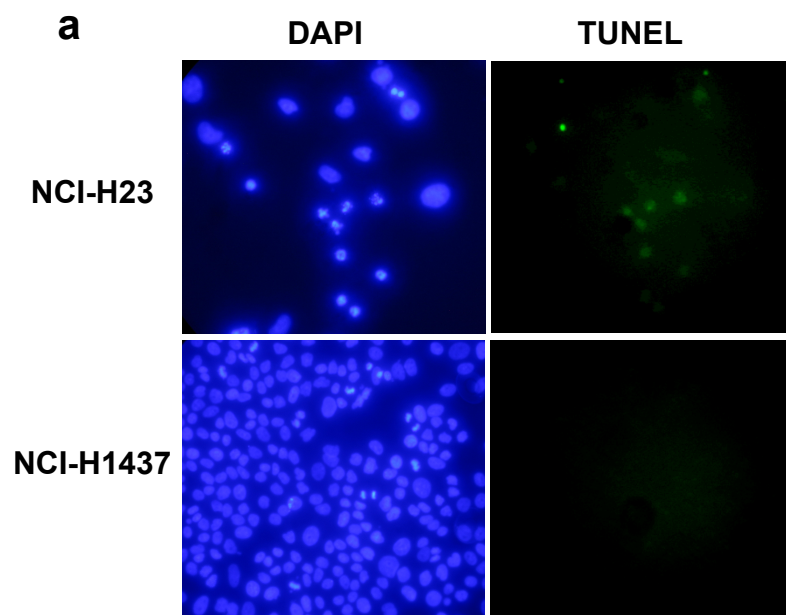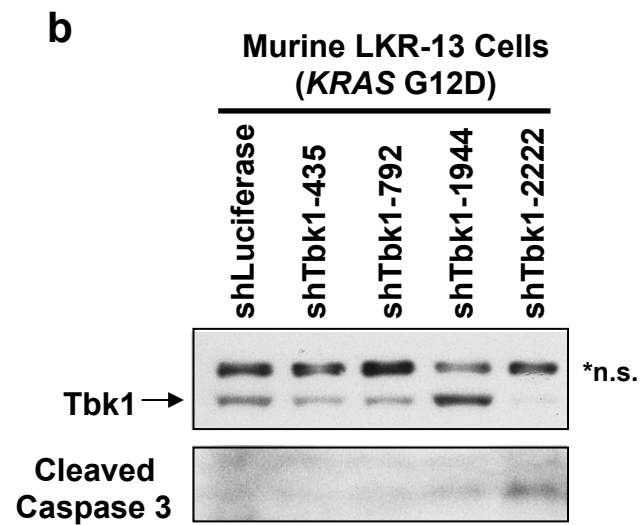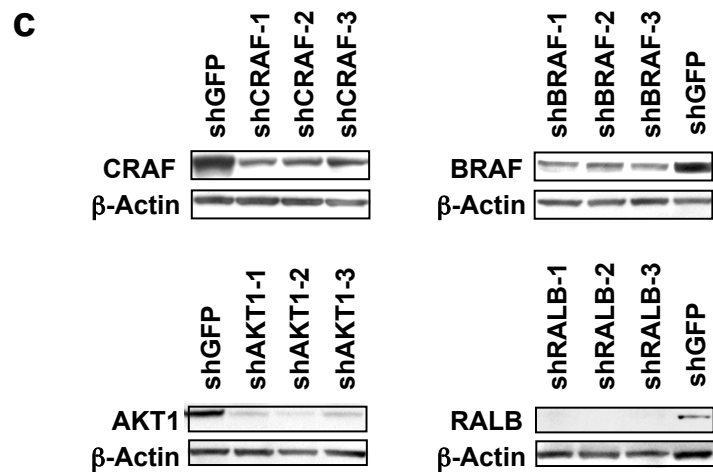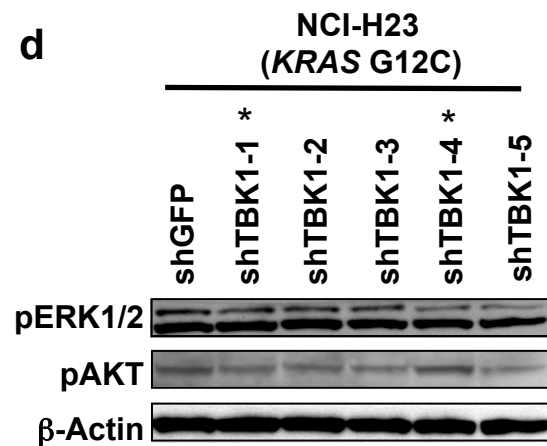



Figure S7

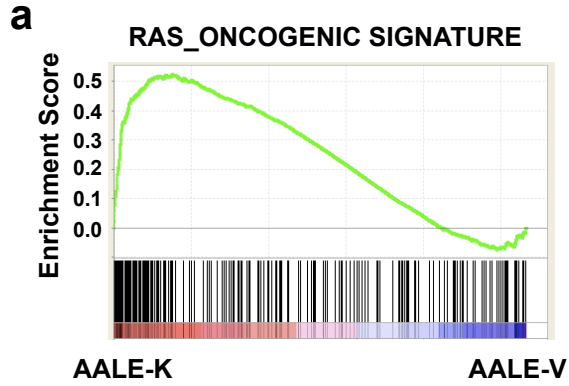

**Upregulated in AALE-K**

| RANK | NAME                           | NES  | FDR    |
|------|--------------------------------|------|--------|
| 1    | RAS_ONCOGENIC_SIGNATURE        | 2.18 | <0.001 |
| 2    | HBX_HCC_UP                     | 2.12 | 0.001  |
| 3    | HINATA_NFKB_UP                 | 2.08 | 0.002  |
| 4    | IKKE_NFKB_SUBSET               | 1.97 | 0.039  |
| 5    | DAC_CGI_BLADDER_UP             | 1.94 | 0.039  |
| 6    | HSA00240_PYRIMIDINE_METABOLISM | 1.94 | 0.035  |
| 7    | SERUM_FIBROBLAST_CORE_UP       | 1.93 | 0.038  |
| 8    | HBX_NL_UP                      | 1.90 | 0.051  |
| 9    | ADIPOCYTE_BRCA_UP              | 1.90 | 0.046  |
| 10   | DORSEY_DOXYCYCLINE_UP          | 1.83 | 0.112  |
| 11   | TNFA_NFKB_DEP_UP               | 1.80 | 0.159  |

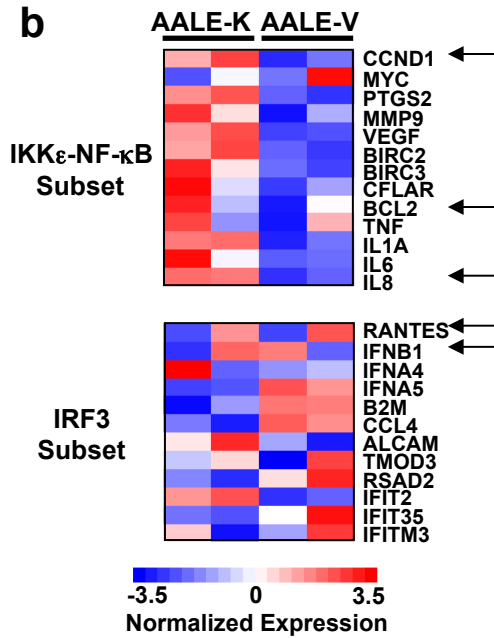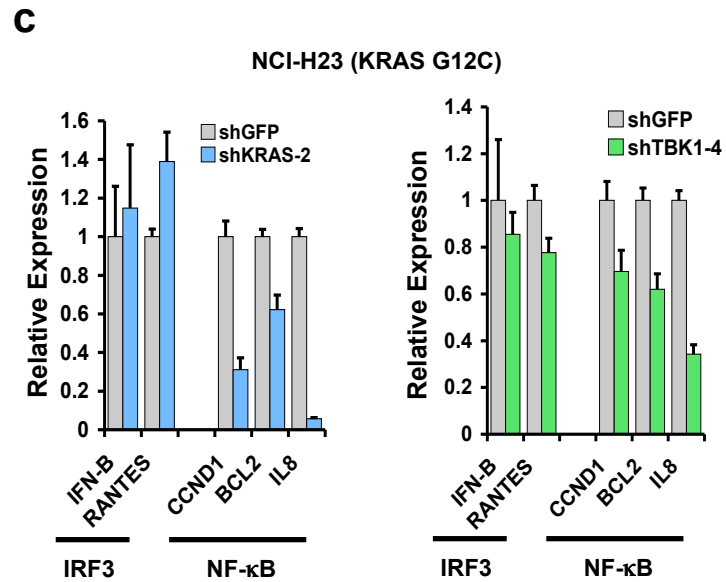

Figure S8

**a**

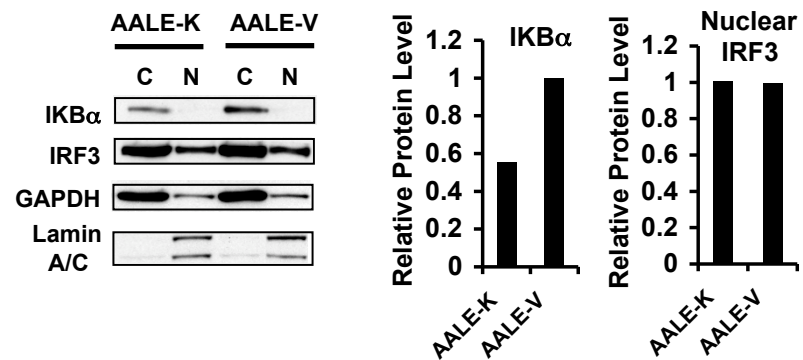

**b**

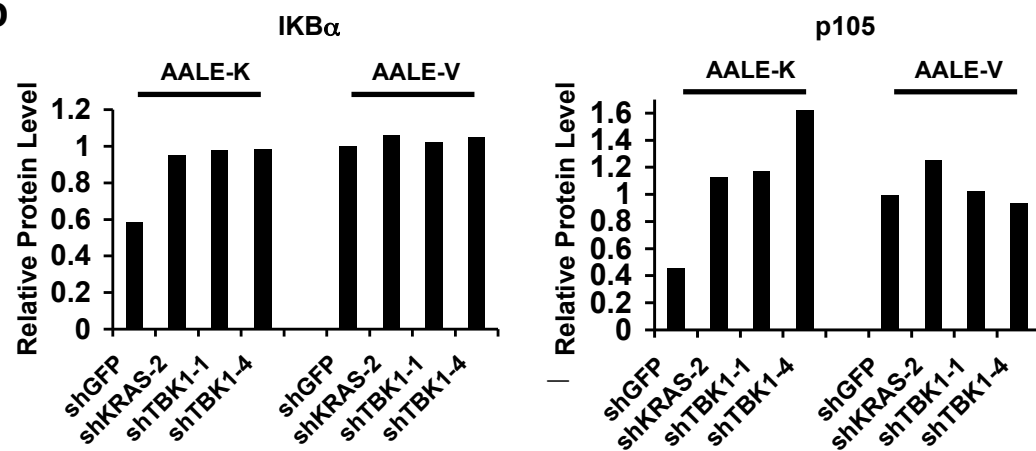

Figure S9

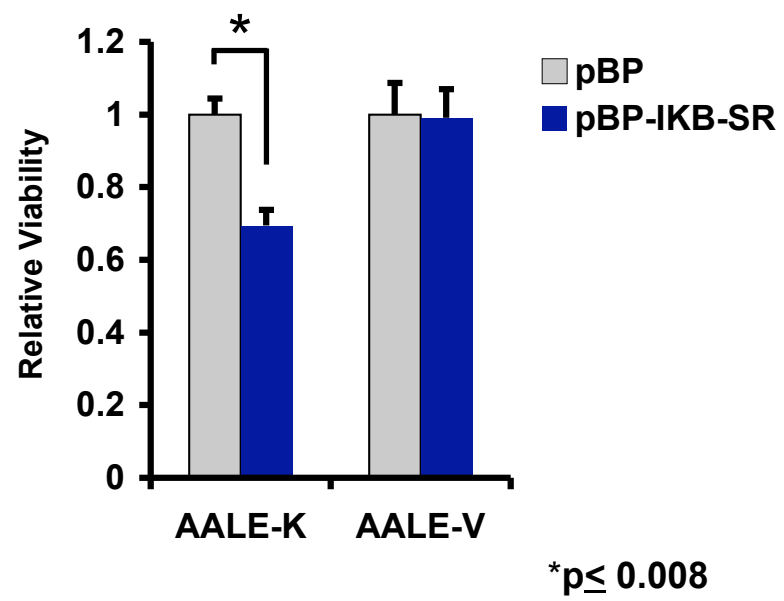

Figure S10

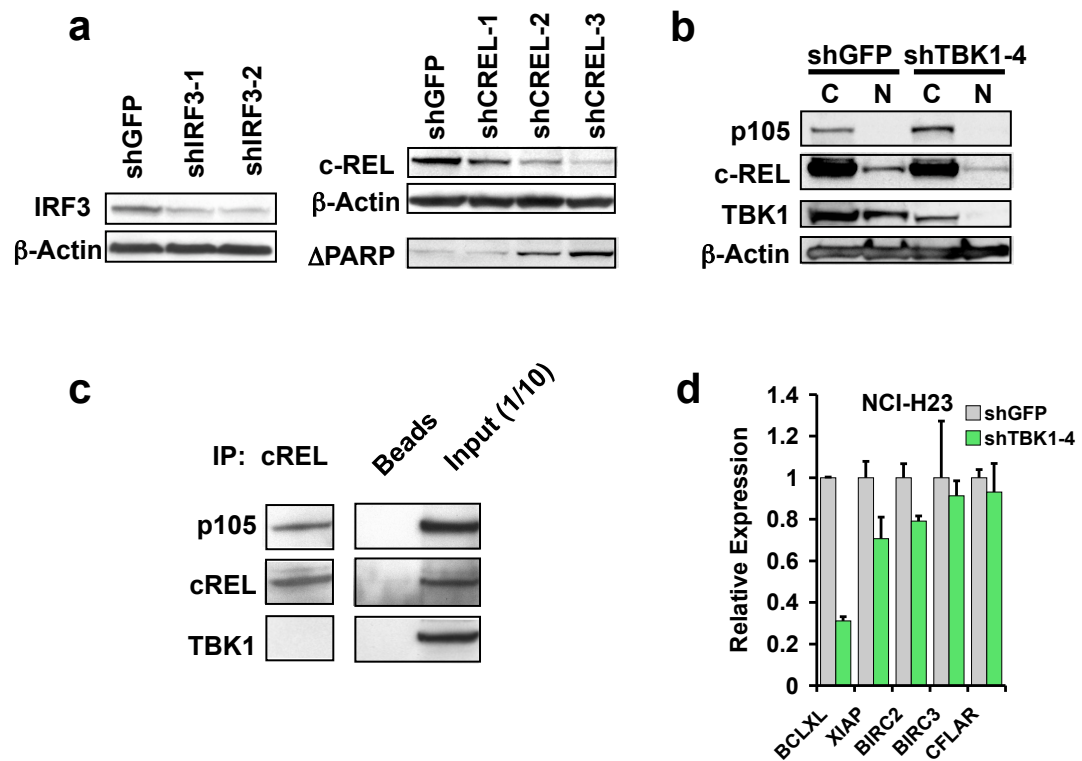

Figure S11

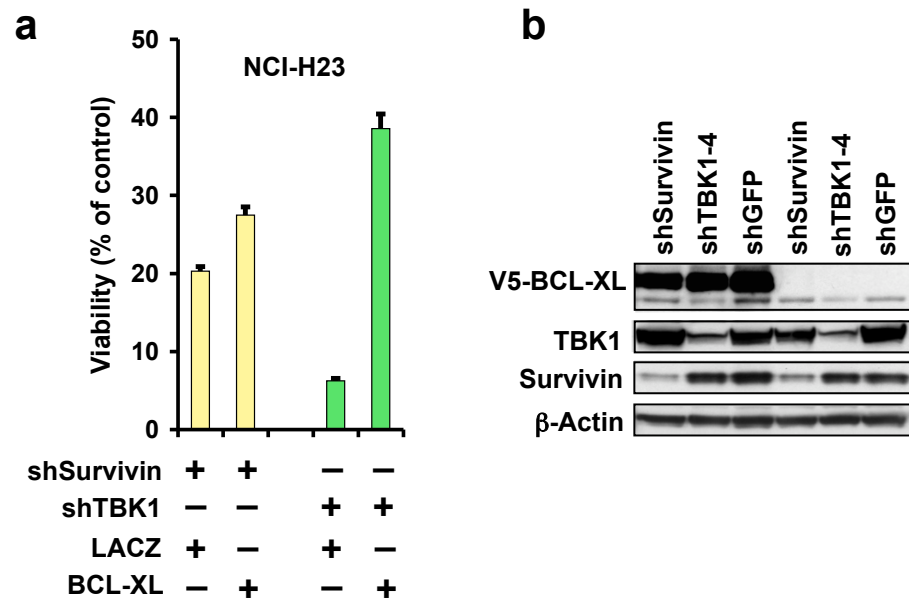

Supplement: NIHMS142035-supplement-1.pdf [file NIHMS142035-supplement-1.pdf]
